# Supplementary material
Source: Elsevier journal article supplement (https://univ-rennes.hal.science/hal-01208401v1/file/mmc3.pdf)
Supplement: mmc3 [file mmc3.pdf]

**Supplementary material 3:** Nomenclature of enoxacin intermediates generated during EF degradation

|                | (1)                                                                                                          | (2)                                                                                                    | (3)                                                                                                  |
|----------------|--------------------------------------------------------------------------------------------------------------|--------------------------------------------------------------------------------------------------------|------------------------------------------------------------------------------------------------------|
| <b>ENO I</b>   | 1-ethyl-6-fluoro-7-{formyl[2-(formylamino)ethyl]amino}-4-oxo-1,4-dihydro-1,8-naphthyridine-3-carboxylic acid |                                                                                                        |                                                                                                      |
| <b>ENO II</b>  | 7-[(2-aminoethyl)(formyl)amino]-1-ethyl-6-fluoro-4-oxo-1,4-dihydro-1,8-naphthyridine-3-carboxylic acid       | 1-ethyl-6-fluoro-7-{[2-(formylamino)ethyl]amino}-4-oxo-1,4-dihydro-1,8-naphthyridine-3-carboxylic acid | 6-fluoro-7-{formyl[2-(formylamino)ethyl]amino}-4-oxo-1,4-dihydro-1,8-naphthyridine-3-carboxylic acid |
| <b>ENO III</b> | 1-ethyl-6-fluoro-7-(formylamino)-4-oxo-1,4-dihydro-1,8-naphthyridine-3-carboxylic acid                       | 7-(dimethylamino)-1-ethyl-6-fluoro-4-oxo-1,4-dihydro-1,8-naphthyridine-3-carboxylic acid               | 7-[ethyl(formyl)amino]-6-fluoro-4-oxo-1,4-dihydro-1,8-naphthyridine-3-carboxylic acid                |
| <b>ENO IV</b>  | 7-amino-1-ethyl-6-fluoro-4-oxo-1,4-dihydro-1,8-naphthyridine-3-carboxylic acid                               | 7-(dimethylamino)-6-fluoro-4-oxo-1,4-dihydro-1,8-naphthyridine-3-carboxylic acid                       | 7-(ethylamino)-6-fluoro-4-oxo-1,4-dihydro-1,8-naphthyridine-3-carboxylic acid                        |
